# Supplementary material
Source: publisher figshare collection journal article supplement (https://gsajournals.figshare.com/articles/dataset/_/14751975)
Supplement: Supplementary file 1 [file 1]

**Supplementary Table 1.** Descriptive statistics of all *MatKD* 0-1.5h embryo RNA-seq data

|                           | <b>Total # Reads</b> | <b># Uniquely Mapped Reads</b> | <b>% Uniquely Mapped Reads</b> | <b>Number Multi-Mapped Reads</b> | <b>% Multi-Mapped Reads</b> |
|---------------------------|----------------------|--------------------------------|--------------------------------|----------------------------------|-----------------------------|
| <i>GFP-MatKD</i> rep1     | 47375127             | 44763764                       | 94.49%                         | 1156623                          | 2.44%                       |
| <i>GFP-MatKD</i> rep2     | 34895487             | 32694270                       | 93.69%                         | 1138630                          | 3.26%                       |
| <i>GFP-MatKD</i> rep3     | 17515312             | 16418018                       | 93.74%                         | 407116                           | 2.32%                       |
| <i>piwi-MatKD</i> #1 rep1 | 20912949             | 20117251                       | 96.20%                         | 386703                           | 1.85%                       |
| <i>piwi-MatKD</i> #1 rep2 | 64693508             | 60860240                       | 94.07%                         | 1308064                          | 2.02%                       |
| <i>piwi-MatKD</i> #1 rep3 | 41342167             | 38564174                       | 93.28%                         | 931481                           | 2.25%                       |
| <i>piwi-MatKD</i> #2 rep1 | 12303735             | 8150556                        | 66.24%                         | 3756240                          | 30.53%                      |
| <i>piwi-MatKD</i> #2 rep2 | 79009015             | 72548594                       | 91.82%                         | 1913042                          | 2.42%                       |
| <i>piwi-MatKD</i> #2 rep3 | 34815729             | 19483548                       | 55.96%                         | 12961436                         | 37.23%                      |
