# Supplementary material
Source: publisher figshare collection journal article supplement (https://gsajournals.figshare.com/articles/dataset/_/14751975)
Supplement: Supplementary file 2 [file 1]

**Supplementary Table 5.** Differentially targetable genes in 0-1.5h *piwi-MatKD* embryos

| Decreased targetability<br>in <i>piwi-MatKD</i> #1 | Decreased targetability<br>in <i>piwi-MatKD</i> #2 | Decreased targetability<br>in both <i>piwi-MatKD</i> | Increased targetability<br>in <i>piwi-MatKD</i> #1 | Increased targetability<br>in <i>piwi-MatKD</i> #2 | Increased targetability<br>in both <i>piwi-MatKD</i> |
|----------------------------------------------------|----------------------------------------------------|------------------------------------------------------|----------------------------------------------------|----------------------------------------------------|------------------------------------------------------|
| <b>114 total</b>                                   | <b>109 total</b>                                   | <b>63 total</b>                                      | <b>41 total</b>                                    | <b>148 total</b>                                   | <b>5 total</b>                                       |
| FBgn0016034                                        | FBgn0053196                                        | FBgn0052865                                          | FBgn0039778                                        | FBgn0004872                                        | FBgn0039778                                          |
| FBgn0028993                                        | FBgn0052865                                        | FBgn0030524                                          | FBgn0038725                                        | FBgn0039778                                        | FBgn0038725                                          |
| FBgn0027339                                        | FBgn0039089                                        | FBgn0010300                                          | FBgn0004872                                        | FBgn0038725                                        | FBgn0004872                                          |
| FBgn0004575                                        | FBgn0030524                                        | FBgn0033261                                          | FBgn0036834                                        | FBgn0038088                                        | FBgn0010313                                          |
| FBgn0010300                                        | FBgn0010300                                        | FBgn0004575                                          | FBgn0010313                                        | FBgn0024958                                        | FBgn0259210                                          |
| FBgn0052369                                        | FBgn0033261                                        | FBgn0052369                                          | FBgn0039883                                        | FBgn0010313                                        |                                                      |
| FBgn0053294                                        | FBgn0004575                                        | FBgn0087035                                          | FBgn0030731                                        | FBgn0259210                                        |                                                      |
| FBgn0038118                                        | FBgn0052369                                        | FBgn0040089                                          | FBgn0033408                                        | FBgn0283434                                        |                                                      |
| FBgn0033261                                        | FBgn0039937                                        | FBgn0085521                                          | FBgn0259210                                        | FBgn0037915                                        |                                                      |
| FBgn0259677                                        | FBgn0087035                                        | FBgn0085693                                          | FBgn0029801                                        | FBgn0030854                                        |                                                      |
| FBgn0261928                                        | FBgn0033538                                        | FBgn0020412                                          | FBgn0003890                                        | FBgn0046706                                        |                                                      |
| FBgn0011747                                        | FBgn0040089                                        | FBgn0264574                                          | FBgn0263847                                        | FBgn0052475                                        |                                                      |
| FBgn0037217                                        | FBgn0085521                                        | FBgn0037307                                          | FBgn0035252                                        | FBgn0067861                                        |                                                      |
| FBgn0003638                                        | FBgn0085693                                        | FBgn0284249                                          | FBgn0011474                                        | FBgn0040350                                        |                                                      |
| FBgn0264574                                        | FBgn0020412                                        | FBgn0052190                                          | FBgn0042627                                        | FBgn0032147                                        |                                                      |
| FBgn0053926                                        | FBgn0264574                                        | FBgn0040011                                          | FBgn0038881                                        | FBgn0053499                                        |                                                      |
| FBgn0052451                                        | FBgn0037307                                        | FBgn0004607                                          | FBgn0023511                                        | FBgn0285991                                        |                                                      |
| FBgn0264492                                        | FBgn0052365                                        | FBgn0031228                                          | FBgn0038273                                        | FBgn0052823                                        |                                                      |
| FBgn0052708                                        | FBgn0284249                                        | FBgn0267798                                          | FBgn0039116                                        | FBgn0053497                                        |                                                      |
| FBgn0031228                                        | FBgn0052190                                        | FBgn0039015                                          | FBgn0050103                                        | FBgn0283432                                        |                                                      |
| FBgn0263289                                        | FBgn0040011                                        | FBgn0004374                                          | FBgn0033224                                        | FBgn0283433                                        |                                                      |
| FBgn0264785                                        | FBgn0051146                                        | FBgn0266873                                          | FBgn0032744                                        | FBgn0003654                                        |                                                      |
| FBgn0015371                                        | FBgn0004607                                        | FBgn0011747                                          | FBgn0031183                                        | FBgn0003890                                        |                                                      |
| FBgn0087035                                        | FBgn0031228                                        | FBgn0037218                                          | FBgn0026262                                        | FBgn0265959                                        |                                                      |
| FBgn0035094                                        | FBgn0036640                                        | FBgn0263289                                          | FBgn0262570                                        | FBgn0031170                                        |                                                      |
| FBgn0003002                                        | FBgn0027341                                        | FBgn0260008                                          | FBgn0032147                                        | FBgn0266581                                        |                                                      |
| FBgn0266404                                        | FBgn0267798                                        | FBgn0029922                                          | FBgn0285991                                        | FBgn0040010                                        |                                                      |
| FBgn0286511                                        | FBgn0039015                                        | FBgn0034013                                          | FBgn0016797                                        | FBgn0053867                                        |                                                      |
| FBgn0267798                                        | FBgn0000384                                        | FBgn0050345                                          | FBgn0051481                                        | FBgn0032744                                        |                                                      |
| FBgn0037213                                        | FBgn0004374                                        | FBgn0011771                                          | FBgn0053158                                        | FBgn0016797                                        |                                                      |
| FBgn0267978                                        | FBgn0266873                                        | FBgn0015371                                          | FBgn0028645                                        | FBgn0051481                                        |                                                      |
| FBgn0064225                                        | FBgn0011747                                        | FBgn0051324                                          | FBgn0039690                                        | FBgn0035252                                        |                                                      |
| FBgn0025674                                        | FBgn0037218                                        | FBgn0003209                                          | FBgn0283741                                        | FBgn0028743                                        |                                                      |
| FBgn0284249                                        | FBgn0263289                                        | FBgn0267809                                          | FBgn0004244                                        | FBgn0053158                                        |                                                      |
| FBgn0052865                                        | FBgn0260008                                        | FBgn0262887                                          | FBgn0261360                                        | FBgn0035437                                        |                                                      |
| FBgn0040089                                        | FBgn0029922                                        | FBgn0002121                                          | FBgn0266136                                        | FBgn0003053                                        |                                                      |
| FBgn0020412                                        | FBgn0051211                                        | FBgn0035253                                          | FBgn0032521                                        | FBgn0283741                                        |                                                      |
| FBgn0266457                                        | FBgn0034013                                        | FBgn0266304                                          | FBgn0263995                                        | FBgn0050103                                        |                                                      |
| FBgn0039938                                        | FBgn0263352                                        | FBgn0050428                                          | FBgn0036199                                        | FBgn0023479                                        |                                                      |
| FBgn0052190                                        | FBgn0050345                                        | FBgn0039966                                          | FBgn0045761                                        | FBgn0011725                                        |                                                      |
| FBgn0037307                                        | FBgn0250910                                        | FBgn0010114                                          | FBgn0085390                                        | FBgn0264443                                        |                                                      |
| FBgn0031171                                        | FBgn0011771                                        | FBgn0267246                                          |                                                    | FBgn0264272                                        |                                                      |
| FBgn0030524                                        | FBgn0015371                                        | FBgn0033371                                          |                                                    | FBgn0000163                                        |                                                      |
| FBgn0040011                                        | FBgn0051324                                        | FBgn0284226                                          |                                                    | FBgn0032857                                        |                                                      |
| FBgn0262887                                        | FBgn0086443                                        | FBgn0051876                                          |                                                    | FBgn0024150                                        |                                                      |
| FBgn0031191                                        | FBgn0003209                                        | FBgn0266404                                          |                                                    | FBgn0261859                                        |                                                      |
| FBgn0004607                                        | FBgn0267809                                        | FBgn0031799                                          |                                                    | FBgn0000241                                        |                                                      |
| FBgn0002121                                        | FBgn0016726                                        | FBgn0033153                                          |                                                    | FBgn0053267                                        |                                                      |
| FBgn0032850                                        | FBgn0262887                                        | FBgn0034406                                          |                                                    | FBgn0041111                                        |                                                      |
| FBgn0085521                                        | FBgn0029898                                        | FBgn0039760                                          |                                                    | FBgn0260049                                        |                                                      |
| FBgn0003209                                        | FBgn0053238                                        | FBgn0266982                                          |                                                    | FBgn0004865                                        |                                                      |
| FBgn0085693                                        | FBgn0044817                                        | FBgn0083990                                          |                                                    | FBgn0085390                                        |                                                      |
| FBgn0023096                                        | FBgn0283473                                        | FBgn0004362                                          |                                                    | FBgn0036199                                        |                                                      |
| FBgn0051324                                        | FBgn0002948                                        | FBgn0266818                                          |                                                    | FBgn0261360                                        |                                                      |
| FBgn0035253                                        | FBgn0002121                                        | FBgn0039946                                          |                                                    | FBgn0045761                                        |                                                      |
| FBgn0044872                                        | FBgn0265042                                        | FBgn0266690                                          |                                                    | FBgn0266136                                        |                                                      |
| FBgn0266873                                        | FBgn0038881                                        | FBgn0263829                                          |                                                    | FBgn0037796                                        |                                                      |
| FBgn0034013                                        | FBgn0035253                                        | FBgn0033108                                          |                                                    | FBgn0032521                                        |                                                      |
| FBgn0266304                                        | FBgn0266304                                        | FBgn0033890                                          |                                                    | FBgn0031975                                        |                                                      |
| FBgn0260008                                        | FBgn0031998                                        | FBgn0262518                                          |                                                    | FBgn0000108                                        |                                                      |
| FBgn0037218                                        | FBgn0050428                                        | FBgn0052647                                          |                                                    | FBgn0264000                                        |                                                      |
| FBgn0266818                                        | FBgn0039966                                        |                                                      |                                                    | FBgn0266100                                        |                                                      |
| FBgn0262847                                        | FBgn0010114                                        |                                                      |                                                    | FBgn0264442                                        |                                                      |

|             |             |
|-------------|-------------|
| FBgn0262848 | FBgn0267246 |
| FBgn0262849 | FBgn0033371 |
| FBgn0262850 | FBgn0036614 |
| FBgn0262851 | FBgn0266652 |
| FBgn0262852 | FBgn0284226 |
| FBgn0262853 | FBgn0051876 |
| FBgn0050345 | FBgn0266404 |
| FBgn0011771 | FBgn0031799 |
| FBgn0039015 | FBgn0031413 |
| FBgn0029922 | FBgn0025837 |
| FBgn0259111 | FBgn0052177 |
| FBgn0262139 | FBgn0261617 |
| FBgn0050428 | FBgn0033153 |
| FBgn0051876 | FBgn0034406 |
| FBgn0051514 | FBgn0053236 |
| FBgn0029603 | FBgn0039760 |
| FBgn0284226 | FBgn0266982 |
| FBgn0267809 | FBgn0083990 |
| FBgn0010114 | FBgn0004362 |
| FBgn0263830 | FBgn0265803 |
| FBgn0030795 | FBgn0038853 |
| FBgn0031799 | FBgn0266818 |
| FBgn0004374 | FBgn0039946 |
| FBgn0033108 | FBgn0039737 |
| FBgn0267246 | FBgn0032350 |
| FBgn0259978 | FBgn0037228 |
| FBgn0039946 | FBgn0266690 |
| FBgn0034406 | FBgn0259728 |
| FBgn0004362 | FBgn0263829 |
| FBgn0033890 | FBgn0052452 |
| FBgn0033371 | FBgn0037944 |
| FBgn0263829 | FBgn0033108 |
| FBgn0039966 | FBgn0033890 |
| FBgn0264794 | FBgn0052797 |
| FBgn0038397 | FBgn0004854 |
| FBgn0266690 | FBgn0262518 |
| FBgn0083990 | FBgn0029799 |
| FBgn0038821 | FBgn0051528 |
| FBgn0033153 | FBgn0052082 |
| FBgn0052647 | FBgn0052647 |
| FBgn0262518 | FBgn0038964 |
| FBgn0039760 | FBgn0275432 |
| FBgn0267058 | FBgn0264904 |
| FBgn0037227 | FBgn0266358 |
| FBgn0035636 | FBgn0036956 |
| FBgn0266982 | FBgn0038139 |
| FBgn0267744 |             |
| FBgn0266698 |             |
| FBgn0010038 |             |
| FBgn0026565 |             |
| FBgn0052475 |             |

|             |
|-------------|
| FBgn0051163 |
| FBgn0265540 |
| FBgn0003326 |
| FBgn0028509 |
| FBgn0261871 |
| FBgn0036680 |
| FBgn0027601 |
| FBgn0026718 |
| FBgn0259680 |
| FBgn0020389 |
| FBgn0024187 |
| FBgn0004870 |
| FBgn0039431 |
| FBgn0033289 |
| FBgn0003042 |
| FBgn0025525 |
| FBgn0030979 |
| FBgn0259215 |
| FBgn0052380 |
| FBgn0052758 |
| FBgn0032694 |
| FBgn0259876 |
| FBgn0037130 |
| FBgn0029761 |
| FBgn0004595 |
| FBgn0260943 |
| FBgn0000568 |
| FBgn0266801 |
| FBgn0052010 |
| FBgn0041092 |
| FBgn0261929 |
| FBgn0028538 |
| FBgn0011206 |
| FBgn0024245 |
| FBgn0030882 |
| FBgn0052816 |
| FBgn0035983 |
| FBgn0005558 |
| FBgn0085370 |
| FBgn0050115 |
| FBgn0053517 |
| FBgn0260866 |
| FBgn0004885 |
| FBgn0037766 |
| FBgn0051998 |
| FBgn0261799 |
| FBgn0085376 |
| FBgn0262018 |
| FBgn0003301 |
| FBgn0024989 |
| FBgn0039690 |
| FBgn0005640 |
| FBgn0004244 |
| FBgn0026058 |
| FBgn0037171 |
| FBgn0265487 |
| FBgn0086906 |
| FBgn0266350 |
| FBgn0263995 |
| FBgn0028645 |
| FBgn0011582 |
| FBgn0041337 |
| FBgn0003090 |
| FBgn0039959 |
| FBgn0015609 |
| FBgn0085443 |
| FBgn0039920 |
| FBgn0058470 |
| FBgn0086655 |
| FBgn0024804 |
| FBgn0085450 |

|  |  |             |
|--|--|-------------|
|  |  | FBgn0267964 |
|  |  | FBgn0000464 |
|  |  | FBgn0004611 |
|  |  | FBgn0263997 |
|  |  | FBgn0263974 |
|  |  | FBgn0085415 |
|  |  | FBgn0028496 |
|  |  | FBgn0259683 |
|  |  | FBgn0259734 |
|  |  | FBgn0265598 |
|  |  | FBgn0003256 |
|  |  | FBgn0052016 |
|  |  | FBgn0264384 |
|  |  | FBgn0267432 |
