# Supplementary material
Source: publisher figshare collection journal article supplement (https://gsajournals.figshare.com/articles/dataset/_/14751975)
Supplement: Supplementary file 3 [file 1]

**Supplementary Table 4.** Descriptive statistics of all *MatKD* 0-1.5h embryo small RNA-seq data

|                           | <b>Total # Reads</b> | <b># piRNA reads (not rRNA,<br/>miRNA, or siRNA; aligned to the<br/><i>Drosophila</i> genome)</b> | <b>% of total reads<br/>that are piRNAs</b> | <b>Aligned antisense to non-<br/>TE genes</b> | <b>% of piRNAs that<br/>map to a non-TE<br/>target</b> | <b>Number of Targeting<br/>Alignment Records</b> |
|---------------------------|----------------------|---------------------------------------------------------------------------------------------------|---------------------------------------------|-----------------------------------------------|--------------------------------------------------------|--------------------------------------------------|
| <i>GFP-MatKD</i> rep1     | 19654415             | 5789114                                                                                           | 29.45                                       | 2947223                                       | 50.91                                                  | 29986375                                         |
| <i>GFP-MatKD</i> rep2     | 20630140             | 6331070                                                                                           | 30.69                                       | 3175830                                       | 50.16                                                  | 31118142                                         |
| <i>GFP-MatKD</i> rep3     | 17765806             | 5350755                                                                                           | 30.12                                       | 2861904                                       | 53.49                                                  | 28736090                                         |
| <i>piwi-MatKD</i> #1 rep1 | 22130757             | 5377730                                                                                           | 24.3                                        | 2670623                                       | 49.66                                                  | 27355789                                         |
| <i>piwi-MatKD</i> #1 rep2 | 17965708             | 4501589                                                                                           | 25.06                                       | 2342525                                       | 52.04                                                  | 24612194                                         |
| <i>piwi-MatKD</i> #1 rep3 | 21577209             | 4760424                                                                                           | 22.06                                       | 2287911                                       | 48.06                                                  | 22536160                                         |
| <i>piwi-MatKD</i> #2 rep1 | 13837789             | 3335564                                                                                           | 24.1                                        | 1879529                                       | 56.35                                                  | 19917472                                         |
| <i>piwi-MatKD</i> #2 rep2 | 15575360             | 4141628                                                                                           | 26.59                                       | 1980495                                       | 47.82                                                  | 20206259                                         |
| <i>piwi-MatKD</i> #2 rep3 | 20860692             | 6371255                                                                                           | 30.54                                       | 3377382                                       | 53.01                                                  | 34902350                                         |
