# Supplementary material
Source: publisher figshare collection journal article supplement (https://gsajournals.figshare.com/articles/dataset/_/14751975)
Supplement: Supplementary file 5 [file 1]

**Supplementary Table 3.** Genes differentially expressed in 0-1.5h F1 embryos of both *piwi-MatKD* lines.

| Down-regulated |               | Up-regulated |          |
|----------------|---------------|--------------|----------|
| FBgn0004872    | piwi          | FBgn0263093  | CR43361  |
| FBgn0038412    | Zip89B        | FBgn0028400  | Syt4     |
| FBgn0034126    | jetboil (jbt) | FBgn0034406  | Jheh3    |
| FBgn0259918    | inaF-B        | FBgn0085732  | CR40190  |
| FBgn0033926    | Arc1          | FBgn0036544  | sff      |
| FBgn0260812    | inaF-D        | FBgn0050428  | CG30428  |
| FBgn0052816    | CG32816       | FBgn0014073  | Tie      |
| FBgn0032079    | CG31886       | FBgn0051324  | CG31324  |
| FBgn0085434    | NaCP60E       | FBgn0259210  | prom     |
| FBgn0040370    | CG13375       | FBgn0262123  | I(2)41Ab |
|                |               | FBgn0031098  | CG17068  |
