# Supplementary material
Source: publisher figshare collection journal article supplement (https://gsajournals.figshare.com/articles/dataset/_/14751975)
Supplement: Supplementary file 6 [file 1]

**Supplementary Table 2.** GO analysis of genes differentially expressed in *piwi-MatKD* #2 0-1.5h embryos, as compared to *GFP-MatKD* embryos

| <b>Up-regulated genes in <i>piwi-MatKD</i> #2 vs <i>GFP-MatKD</i></b>                   |          |                       |                   |                        |                    |            |
|-----------------------------------------------------------------------------------------|----------|-----------------------|-------------------|------------------------|--------------------|------------|
| <b>GO biological process</b>                                                            | <b>#</b> | <b># in reference</b> | <b># expected</b> | <b>Fold Enrichment</b> | <b>raw P value</b> | <b>FDR</b> |
| proteasomal ubiquitin-independent protein catabolic process                             | 16       | 14                    | 0.19              | 72.62                  | 6.84E-20           | 4.08E-17   |
| proteasomal protein catabolic process                                                   | 194      | 38                    | 2.34              | 16.26                  | 2.02E-33           | 7.82E-30   |
| proteolysis involved in cellular protein catabolic process                              | 290      | 39                    | 3.49              | 11.16                  | 9.03E-29           | 9.99E-26   |
| cellular macromolecule catabolic process                                                | 396      | 40                    | 4.77              | 8.38                   | 3.37E-25           | 2.61E-22   |
| protein catabolic process                                                               | 307      | 40                    | 3.7               | 10.81                  | 4.65E-29           | 6.00E-26   |
| positive regulation of RNA polymerase II transcriptional preinitiation complex assembly | 8        | 7                     | 0.1               | 72.62                  | 1.71E-10           | 6.96E-08   |
| proteasome assembly                                                                     | 13       | 8                     | 0.16              | 51.07                  | 5.78E-11           | 2.49E-08   |
| proteasome-mediated ubiquitin-dependent protein catabolic process                       | 185      | 38                    | 2.23              | 17.05                  | 4.22E-34           | 3.27E-30   |
| signaling                                                                               | 1033     | 41                    | 12.45             | 3.29                   | 4.59E-12           | 2.09E-09   |

  

| <b>Down-regulated genes in <i>piwi-MatKD</i> #2 vs <i>GFP-MatKD</i></b> |          |                       |                   |                        |                    |            |
|-------------------------------------------------------------------------|----------|-----------------------|-------------------|------------------------|--------------------|------------|
| <b>GO biological process</b>                                            | <b>#</b> | <b># in reference</b> | <b># expected</b> | <b>Fold Enrichment</b> | <b>raw P value</b> | <b>FDR</b> |
| posterior Malpighian tubule development                                 | 3        | 3                     | 0.07              | 45.83                  | 1.83E-04           | 6.43E-03   |
| Malpighian tubule development                                           | 65       | 16                    | 1.42              | 11.28                  | 1.09E-11           | 3.84E-09   |
| renal tubule development                                                | 65       | 16                    | 1.42              | 11.28                  | 1.09E-11           | 3.67E-09   |
| epithelium development                                                  | 903      | 48                    | 19.7              | 2.44                   | 1.22E-08           | 1.26E-06   |
| renal system development                                                | 74       | 16                    | 1.61              | 9.91                   | 5.87E-11           | 1.47E-08   |
| animal organ development                                                | 1126     | 70                    | 24.57             | 2.85                   | 7.49E-16           | 1.16E-12   |
| sex determination, establishment of X:A ratio                           | 5        | 5                     | 0.11              | 45.83                  | 9.82E-07           | 6.98E-05   |
| primary sex determination, soma                                         | 11       | 5                     | 0.24              | 20.83                  | 1.53E-05           | 7.61E-04   |
| somatic sex determination                                               | 18       | 5                     | 0.39              | 12.73                  | 1.04E-04           | 3.95E-03   |
| primary sex determination                                               | 16       | 5                     | 0.35              | 14.32                  | 6.54E-05           | 2.63E-03   |
| amioserosa formation                                                    | 8        | 7                     | 0.17              | 40.1                   | 1.03E-08           | 1.11E-06   |
| gastrulation involving germ band extension                              | 43       | 12                    | 0.94              | 12.79                  | 1.32E-09           | 1.96E-07   |
| gastrulation with mouth forming first                                   | 43       | 12                    | 0.94              | 12.79                  | 1.32E-09           | 1.93E-07   |
| anatomical structure formation involved in morphogenesis                | 485      | 34                    | 10.58             | 3.21                   | 4.36E-09           | 5.63E-07   |
| positive regulator of activin receptor signaling pathway                | 4        | 3                     | 0.09              | 34.37                  | 3.16E-04           | 1.02E-02   |
